# Supplementary material
Source: PubMed Central journal article supplement (PMC11104845)

# Da Costa\_Supplemental\_FigS7

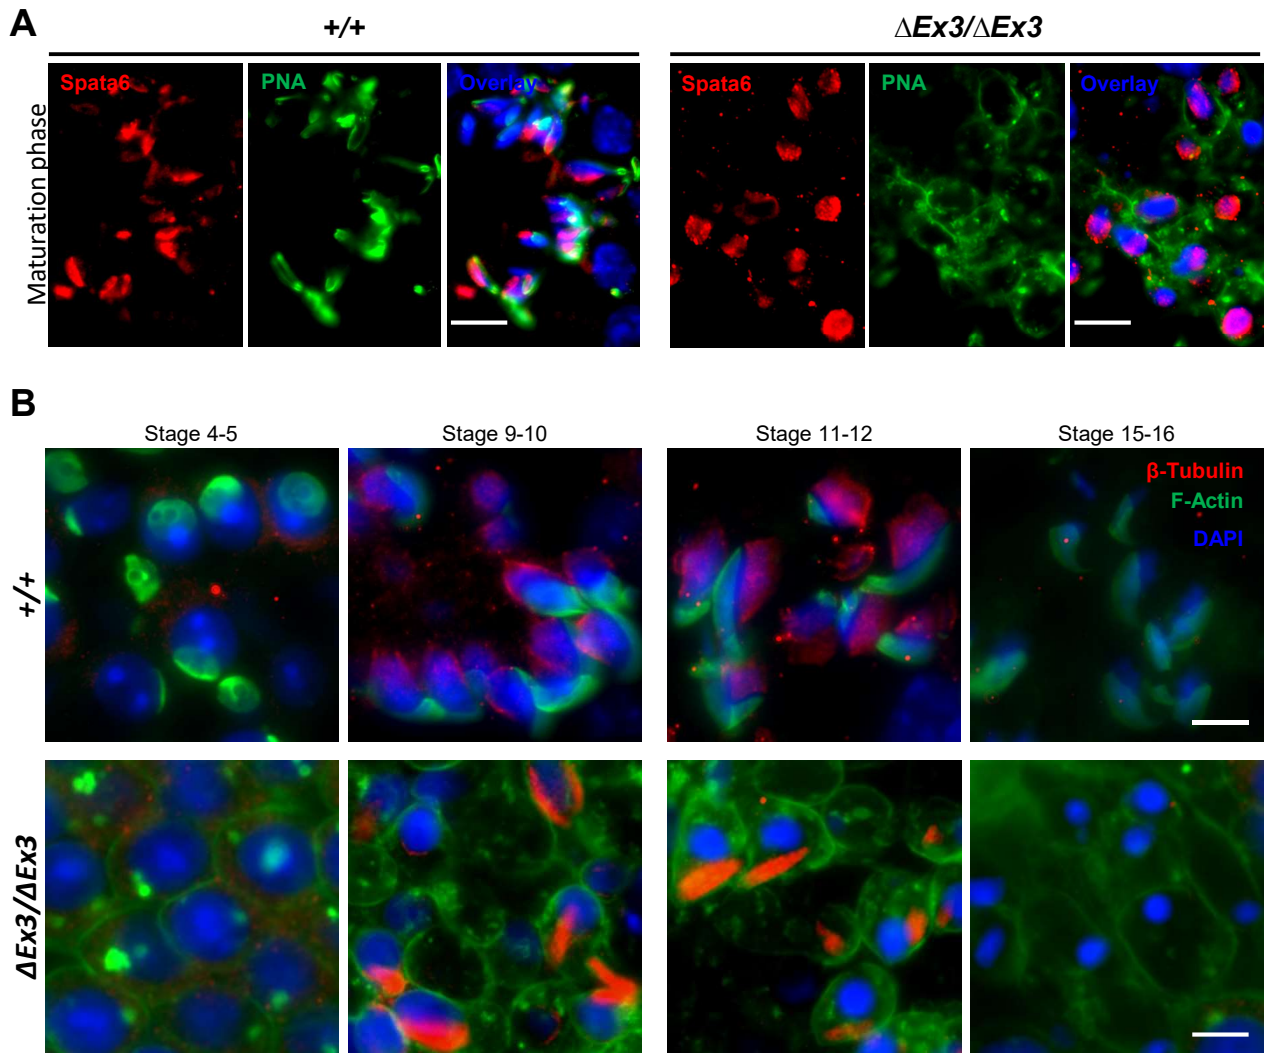

Supplement: 18_2019_3192_MOESM7_ESM.pdf [file 18_2019_3192_MOESM7_ESM.pdf]
